# Supplementary material
Source: Springer Nature journal article supplement (https://www.springermedizin.de/resource/supplementary/12984_2010_318_MOESM4_ESM.pdf/9605762)

# Force Toward, Impaired Arm

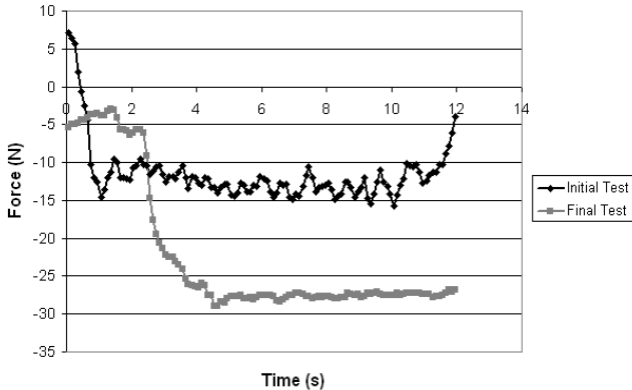

Supplement: MOESM4 [file 9605762]
